# Supplementary material for: Development of a Combined Standard Additions/Internal Standards Method to Quantify Residual PEG in Ethoxylated Surfactants by MALDI TOFMS
Source: Springer Nature journal article supplement (doi:10.1007/s13361-010-0065-9), 2011-01-28
Supplement: MOESM2 [file 13361_2010_65_MOESM2_ESM.doc]

**Figure S1.** MALDI mass spectra of mixtures of PEG 1500 and PEG-OMe (PS). The sample in spectrum (a) contains 10 wt% PEG, while the sample in spectrum contains 50 wt% PEG.
